# Supplementary material for: Increase of light aromatics space time yield by addition of SAPO-34 into multifunctional catalyst
Source: Royal Society of Chemistry journal article supplement (doi:10.1039/d5ra08666c), 2026-01-01
Supplement: d5ra08666c1.pdf [file d5ra08666c1.pdf]

## **Increase of light aromatics space time yield by addition of SAPO-34 into multifunctional catalyst**

Shiyu Liu<sup>a</sup>, Qiuyun Huang<sup>a</sup>, Jie Wang<sup>a</sup>, Weihua Shen<sup>a,\*</sup>, Yunjin Fang<sup>a,\*</sup>

<sup>a</sup>State Key Laboratory of Chemical Engineering and Low-Carbon Technology, School of Chemical Engineering, East China University of Science and Technology, Shanghai 200237, China.

\*Corresponding Author

Email: whshen@ecust.edu.cn(Prof. Shen); yjfang@ecust.edu.cn(Prof. Fang)

Tel: +86-21-64252829

Table S1 XRF results of oxides and zeolites

| Sample                                   | Molar composition |           |             |
|------------------------------------------|-------------------|-----------|-------------|
| 6Mn4Zr                                   | Mn (mol%)         | Zr (mol%) | Mn/Zr ratio |
|                                          | 59.35             | 40.65     | 1.46        |
| Zn1.0Cr<br>Zn1.1Cr<br>Zn1.2Cr<br>Zn1.3Cr | Zn (mol%)         | Cr (mol%) | Zn/Cr ratio |
|                                          | 27.19             | 46.19     | 0.94        |
|                                          | 29.19             | 42.90     | 1.08        |
|                                          | 31.94             | 42.38     | 1.20        |
|                                          | 32.86             | 39.69     | 1.32        |
| H-ZSM-5(60)                              | Si (mol%)         | Al (mol%) |             |
|                                          | 98.32             | 1.68      |             |
| SAPO-34(0.1)                             | Si (mol%)         | Al (mol%) | P (mol%)    |
|                                          | 4.44%             | 43.54%    | 52.02%      |

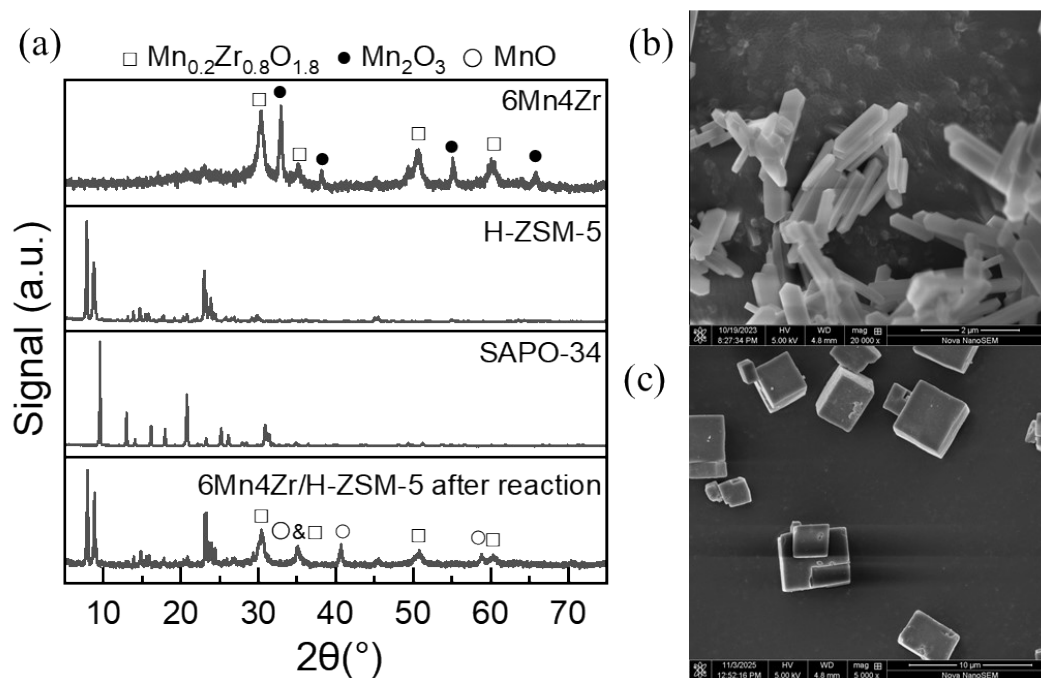

Figure S1. (a) XRD patterns of 6Mn4Zr, H-ZSM-5 and SAPO-34; (b) SEM figure of H-ZSM-5 and (c) SEM figure of SAPO-34.

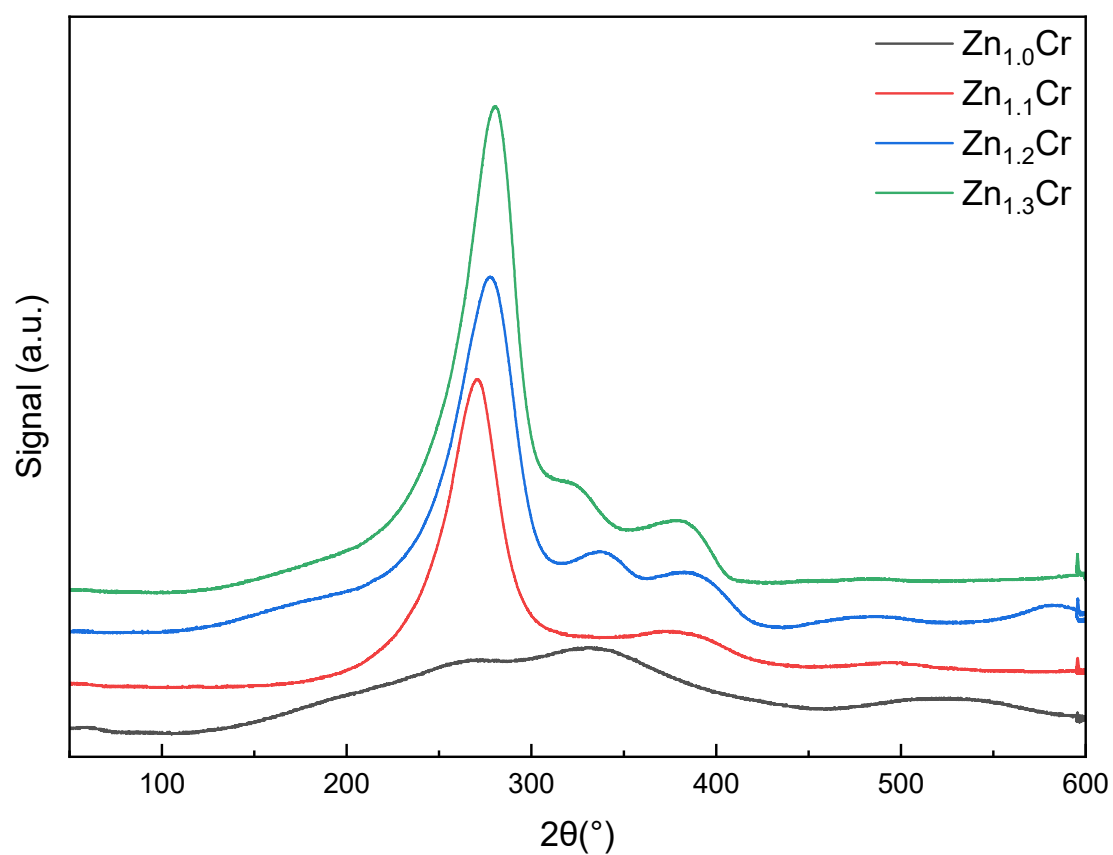

Figure S2. H<sub>2</sub>-TPR profile of Zn<sub>x</sub>Cr.

Table S2. Quantification of XPS profiles of Zn<sub>x</sub>Cr

| Oxides               | Fresh oxides          |                          | Reduced oxides        |                          |
|----------------------|-----------------------|--------------------------|-----------------------|--------------------------|
|                      | Zn/Cr ratio<br>(mol%) | Oxygen vacancy<br>(mol%) | Zn/Cr ratio<br>(mol%) | Oxygen vacancy<br>(mol%) |
| Zn <sub>1.0</sub> Cr | 0.32                  | 15.95                    | 0.34                  | 23.07                    |
| Zn <sub>1.1</sub> Cr | 0.45                  | 21.51                    | 0.47                  | 26.97                    |
| Zn <sub>1.2</sub> Cr | 0.56                  | 22.26                    | 0.59                  | 28.99                    |
| Zn <sub>1.3</sub> Cr | 0.63                  | 25.35                    | 0.68                  | 30.39                    |

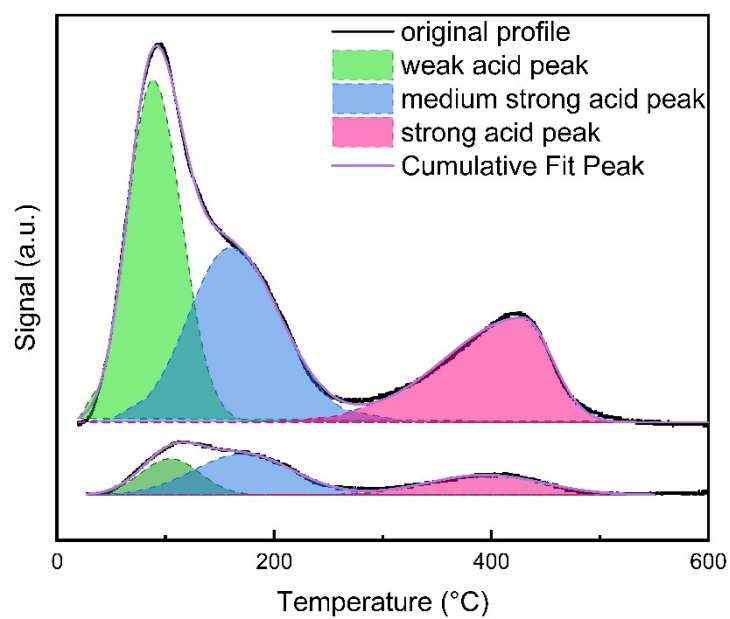

Figure S3. NH<sub>3</sub>-TPD profile of zeolites.

Table S3 Quantification of acid sites in Figure S2

| Zeolites | Acid sites distribution |                          |                   | Total acid sites<br>μmol/g |
|----------|-------------------------|--------------------------|-------------------|----------------------------|
|          | Weak acid sites         | Medium strong acid sites | Strong acid sites |                            |
| H-ZSM-5  | 19.07%                  | 52.09%                   | 28.84%            | 73.45                      |
| SAPO-34  | 43.01%                  | 31.56%                   | 25.43%            | 720.41                     |

Table S4 Quantification of HCPs in figure 3

| Mass ratio of H-ZSM-5 to SAPO-34 | Mass ratio at<br>230°C | Mass ratio at<br>800°C | Amount of<br>HCPs |
|----------------------------------|------------------------|------------------------|-------------------|
| 1:0                              | 98.23                  | 95.52                  | 2.71              |
| 2:1                              | 88.66                  | 85.14                  | 3.52              |
| 1:1                              | 88.25                  | 82.53                  | 5.72              |
| 1:2                              | 90.84                  | 85.20                  | 5.64              |
| 0:1                              | 85.49                  | 80.31                  | 5.18              |

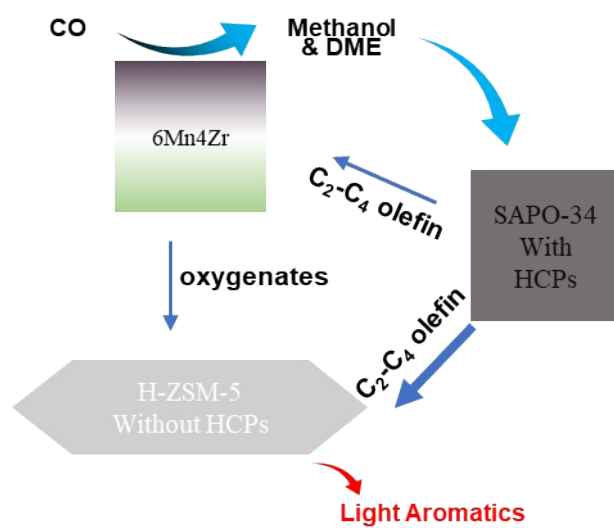

Scheme S1. Reaction mechanism over 6Mn4Zr/H-ZSM-5/SAPO-34

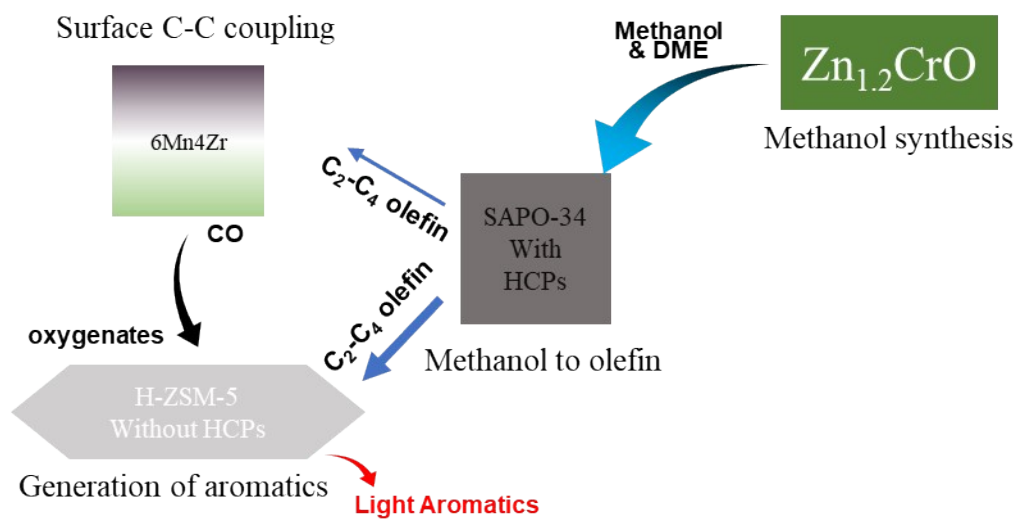

Scheme S2. Reaction mechanism over  $\text{Zn}_{1.2}\text{Cr}(I)|6\text{Mn4Zr}/\text{H-ZSM-5}/\text{SAPO-34}(2:1:1)(8)$
